# Supplementary material for: An olive-shaped SnO2 nanocrystal-based low concentration H2S gas sensor with high sensitivity and selectivity
Source: Royal Society of Chemistry journal article supplement (doi:10.1039/c5cp02854j), 2015-01-01
Supplement: c5cp02854j1.pdf [file c5cp02854j1.pdf]

## Supplementary Information

### Olive-shaped SnO<sub>2</sub> nanocrystals-based low concentration H<sub>2</sub>S gas sensor with high sensitivity and selectivity

Jun Hu,<sup>‡</sup> <sup>a</sup> Guilin Yin,<sup>‡</sup> <sup>a,b</sup> Junchen Chen,<sup>a</sup> Meiyong Ge,<sup>a</sup> Jing Lu,<sup>a</sup> Zhi Yang,<sup>c</sup> Dannong He<sup>\*a,b</sup>

<sup>a</sup> National Engineering Research Center for Nanotechnology, Shanghai 200241, PR China.

<sup>b</sup> School of Material Science and Engineering, Shanghai Jiao Tong University, Shanghai 200240, PR China

<sup>c</sup> Key Laboratory for Thin Film and Microfabrication of Ministry of Education, Department of Micro/Nano Electronics, School of Electronic Information and Electrical Engineering, Shanghai Jiao Tong University, Shanghai 200240, PR China.

\* Corresponding author. E-mail: hdnbill@163.com

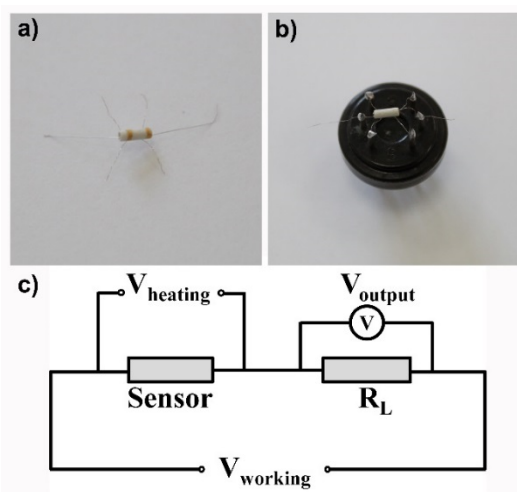

**Fig. S1.** a) Ceramic tube with heating coil. b) Gas sensor unit of SnO<sub>2</sub> nanoparticles fixed on the electronic bracket. c) Working principle and schematic diagram of the gas sensing measurement system.

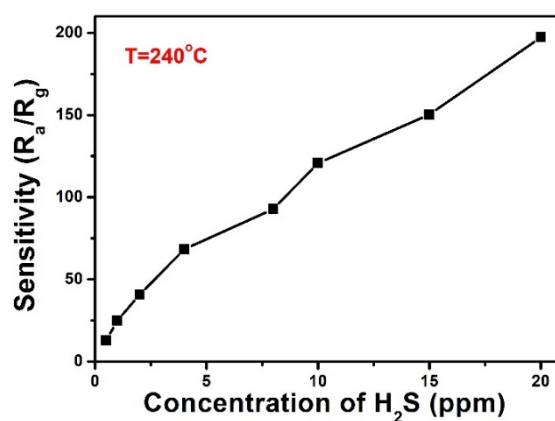

**Fig. S2.** The sensitivity of the typical olive-shaped SnO<sub>2</sub> at 240 °C.

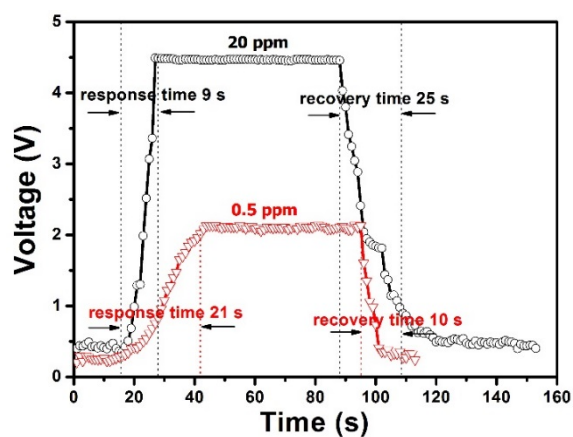

**Fig. S3.** The response time and the recovery time of the typical olive-shaped  $\text{SnO}_2$  at 240 °C in 0.5 and 20 ppm of  $\text{H}_2\text{S}$ .

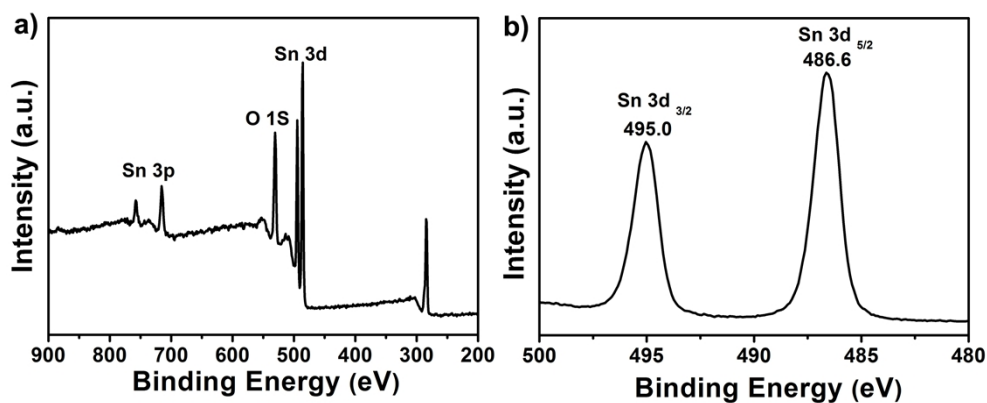

**Fig. S4** a) XPS survey graph and b) Sn 3d XPS spectra of the commercial  $\text{SnO}_2$  nanoparticles. The Sn  $3d_{3/2}$  and  $3d_{5/2}$  are peaked at the binding energies of 495 eV and 486.6 eV, respectively, both of them can be assigned to  $\text{Sn}^{4+}$  of bulk  $\text{SnO}_2$ , showing almost the same result to the prepared olive-shaped  $\text{SnO}_2$  nanocrystals.

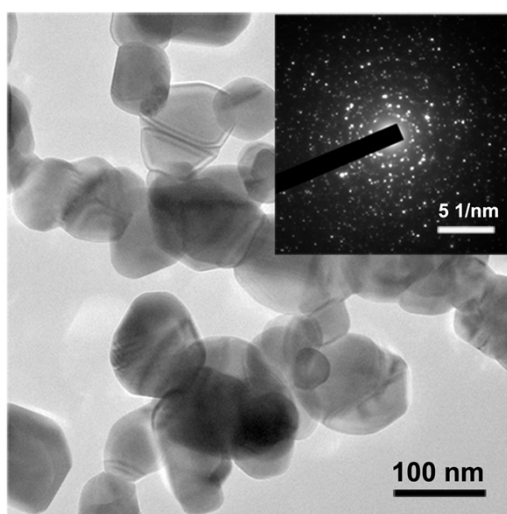

**Fig. S5.** TEM image of the commercial SnO<sub>2</sub> nanoparticles, inset: The corresponding SAED pattern.
